# Supplementary material
Source: HighWire-hosted journal article supplement (https://www.rcpjournals.org/highwire/filestream/11673/field_highwire_adjunct_files/0/S3_Data_collection_form.pdf)
Supplement: S3_Data_collection_form.pdf [file S3_Data_collection_form.pdf]

### S3. Data collection form

### Data Collection Form

## Incorporating SPACES recommendations to the COVID ward care approach at the Royal Bournemouth Hospital

[illegible]
